# Supplementary material
Source: PubMed Central journal article supplement (PMC6393619)
Supplement: supp_RA118.006764_142027_1_supp_247597_pjdt77.pdf [file supp_RA118.006764_142027_1_supp_247597_pjdt77.pdf]

**Figure S1.** The *LMNB1* exon 7/8 junction is similarly reduced as *LMNB1* exon 5/6 (Fig. 8G) in response to Tat-SF1 or SF3b1 knockdown. Primer locations and sequences are given in Table S1. Unpaired, two tailed t-tests with Welch's correction: \*,  $p < 0.05$ ; \*\*,  $p < 0.005$ ; \*\*\*,  $p < 0.0005$ ; \*\*\*\*,  $p < 0.0001$ .

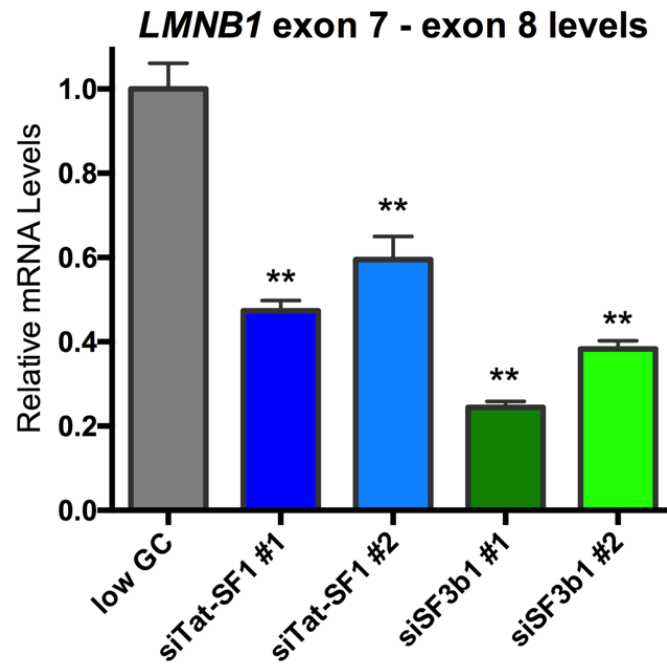

**Table S1. Sequences and locations of primers used for RT-qPCR.**

| <b>GENE NAME</b> | <b>RefSeq ID</b>      | <b>LOCATION</b>                                             | <b>SEQUENCE</b>                                      |
|------------------|-----------------------|-------------------------------------------------------------|------------------------------------------------------|
| <i>SF3B1</i>     | <u>NM_012433.3</u>    | exon 11 (1633) / exon 12 (1634-1652)<br>exon 13 (1879-1860) | GGCTGCATTGCGTCAGATTA<br>CTCTCGGCCTTCCACTCTAG         |
| <i>HTATSF1</i>   | <u>NM_001163280.1</u> | exon 5 (968-982)<br>exon 6 (1082-1062)                      | AAAGGAAGACGGTCTTTGCTG<br>CAGTTGAACTTTGCCACCTC        |
| <i>CCND1</i>     | <u>NM_053056.2</u>    | exon 3 (719-738)<br>exon 4 (899-880)                        | GGCGGAGGAGAACAAACAGA<br>TGTGAGGCGGTAGTAGGACA         |
| <i>SIN3B</i>     | <u>NM_015260.3</u>    | exon 8 (1045-1063)<br>exon 9 (1260-1241)                    | GCTGGTGTCTGGCTCTGAG<br>TGGTAGGTTTTGGGGAGTGC          |
| <i>LMNB1</i>     | <u>NM_005573.3</u>    | exon 4 (1597-1616)<br>exon 5 (1763-1744)                    | GTATGAGTACAAGCTGGCGC<br>GTTCCTCCCTGGCACTGTTG         |
| <i>LMNB1</i>     | <u>NM_005573.3</u>    | exon 7 (2079-2098)<br>exon 8 (2304-2285)                    | TGACAGTATCCCGAGCATCC<br>CTGATCATCTCCAGCCTCC          |
| <i>DUSP11</i>    | <u>NM_003584.2</u>    | exon 4 (540-561)<br>exon 5 (674-678) / exon 6 (699-679)     | TCAAGTGCCTGATGATGAGACT<br>GCCTTCTACATCAATCAAATATCTGC |
| <i>18S</i>       | <u>NR_145820.1</u>    | (1140-1159)<br>(1374-1354)                                  | GGGAAACCAAAGTCTTTGGG<br>GGAATTAACCAGACAAATCGC        |
